# Supplementary material
Source: PubMed Central journal article supplement (PMC7610432)
Supplement: EMS119443-supplement-Appendix.pdf [file EMS119443-supplement-Appendix.pdf]

### Appendix 1 Animal Transport Certificate

This certificate has been designed by SITPRO Ltd to comply with the relevant UN aligned document.

|                                            |                                                                        |                              |
|--------------------------------------------|------------------------------------------------------------------------|------------------------------|
| 1. Sender/agent name and address           | <b>Animal Transport Certificate</b>                                    |                              |
|                                            | 2. Booking number                                                      | 3. Sender's reference        |
|                                            | 4. Carrier's reference                                                 | 5. Other reference           |
| 6. Consignee                               | 7. Carrier/transporters name and address                               |                              |
| 8. Place of delivery address               | 9. Place of loading address                                            |                              |
|                                            | 10. Owner of the animals name and address (if not sender or consignee) |                              |
| 11. Flight no./vehicle ref no./trailer no. |                                                                        |                              |
| 12. Date and time of departure/dispatch    |                                                                        |                              |
| 13. Identifying marks                      | Description/Species                                                    | Total net wt (kg)            |
| 14. Comments and incidents on the journey  |                                                                        |                              |
| 15. Name of carrier/agent                  | 16. ARE THE ANIMALS UNACCOMPANIED?                                     | 17. Name of sender/agent     |
| Name of signatory                          |                                                                        | Name of contact and tel. no. |
| Place and date                             |                                                                        | Place and date of issue      |
| Signature of carrier/transporters          | HAS THE CONSIGNEE BEEN NOTIFIED?                                       | Signature                    |
|                                            | If the answer is YES then place a "Y" in the applicable box            |                              |

**Appendix 2 Route Plan**

|                                                                                                                            |                                                                                                               |                                                                        |                                        |        |
|----------------------------------------------------------------------------------------------------------------------------|---------------------------------------------------------------------------------------------------------------|------------------------------------------------------------------------|----------------------------------------|--------|
| 1. Sender name and address                                                                                                 |                                                                                                               | <b>Route Plan</b>                                                      |                                        |        |
|                                                                                                                            |                                                                                                               | 2. Booking number                                                      | 3. Sender's reference                  |        |
|                                                                                                                            |                                                                                                               | 4. Carrier's reference                                                 | 5. Other references                    |        |
| 6. Consignee                                                                                                               |                                                                                                               | 7. Carrier/transporters name and address                               |                                        |        |
| 8. Place of delivery address                                                                                               |                                                                                                               | 9. Place of loading address                                            |                                        |        |
| 10. Means of transport                                                                                                     | 11. Estimated journey time                                                                                    | 12. Owner of the animals name and address (if not sender or consignee) |                                        |        |
| 13. Flight no./vehicle ref. no/trailer no.                                                                                 |                                                                                                               |                                                                        |                                        |        |
| 14. Date and time of departure/dispatch                                                                                    |                                                                                                               |                                                                        |                                        |        |
| 15. Route plan: for transit, feeding, watering and resting of animals during transport as required by Directive 91/628/EEC |                                                                                                               |                                                                        |                                        |        |
| STOPPING OR TRANSFER POINT (S): -                                                                                          |                                                                                                               |                                                                        |                                        |        |
| Place and address                                                                                                          |                                                                                                               | Date and time                                                          | Length of stop                         | Reason |
|                                                                                                                            |                                                                                                               |                                                                        |                                        |        |
|                                                                                                                            |                                                                                                               |                                                                        |                                        |        |
|                                                                                                                            |                                                                                                               |                                                                        |                                        |        |
| 16. Comments/observations and additional accompanying documents                                                            |                                                                                                               |                                                                        |                                        |        |
| 17. Name of person in charge of transfer during journey                                                                    | 18. Authorized stamp of the Competent authority of the Point of exit (3 <sup>rd</sup> country movements only) |                                                                        | 19. Carrier/transporters name          |        |
| Date and time of arrival                                                                                                   |                                                                                                               |                                                                        | Carrier/transporters signature         |        |
| Signature of person in charge during journey                                                                               |                                                                                                               |                                                                        |                                        |        |
| 20. Authorized stamp of the veterinarian of the place of departure                                                         |                                                                                                               |                                                                        | 21. Name of company preparing document |        |
|                                                                                                                            | Name of contact and tel. no.                                                                                  |                                                                        |                                        |        |
|                                                                                                                            | Place and date of issue                                                                                       |                                                                        |                                        |        |
|                                                                                                                            | Signature                                                                                                     |                                                                        |                                        |        |
